# Supplementary material
Source: publisher site journal article supplement (https://www.spandidos-publications.com/5332/downloadSupplementary)

Figure S1. The transfection efficacy of miRNA controls with a Dy547 label transfected into 143B and HOS cells. (A) The comparison of fluorescent 143B cells in the group transfected with Dy547-labelled miRNA (upper row) and the non-treated group (lower row). (B) Percentages of fluorescent 143B cells are  $80.5 \pm 2.5\%$  in the transfected cells group and  $7.3 \pm 0.8\%$  in the non-treated cell group ( $P < 0.05$ ). (C) The comparison of fluorescent HOS cells in the group transfected with Dy547-labelled miRNAs (upper row) and the non-treated cell group (lower row). (D) Percentages of fluorescent HOS cells are  $64.4 \pm 3.8\%$  in the transfected cells group and  $0.2 \pm 0.2\%$  in the non-treated cell group ( $P < 0.05$ ). miR, microRNA.

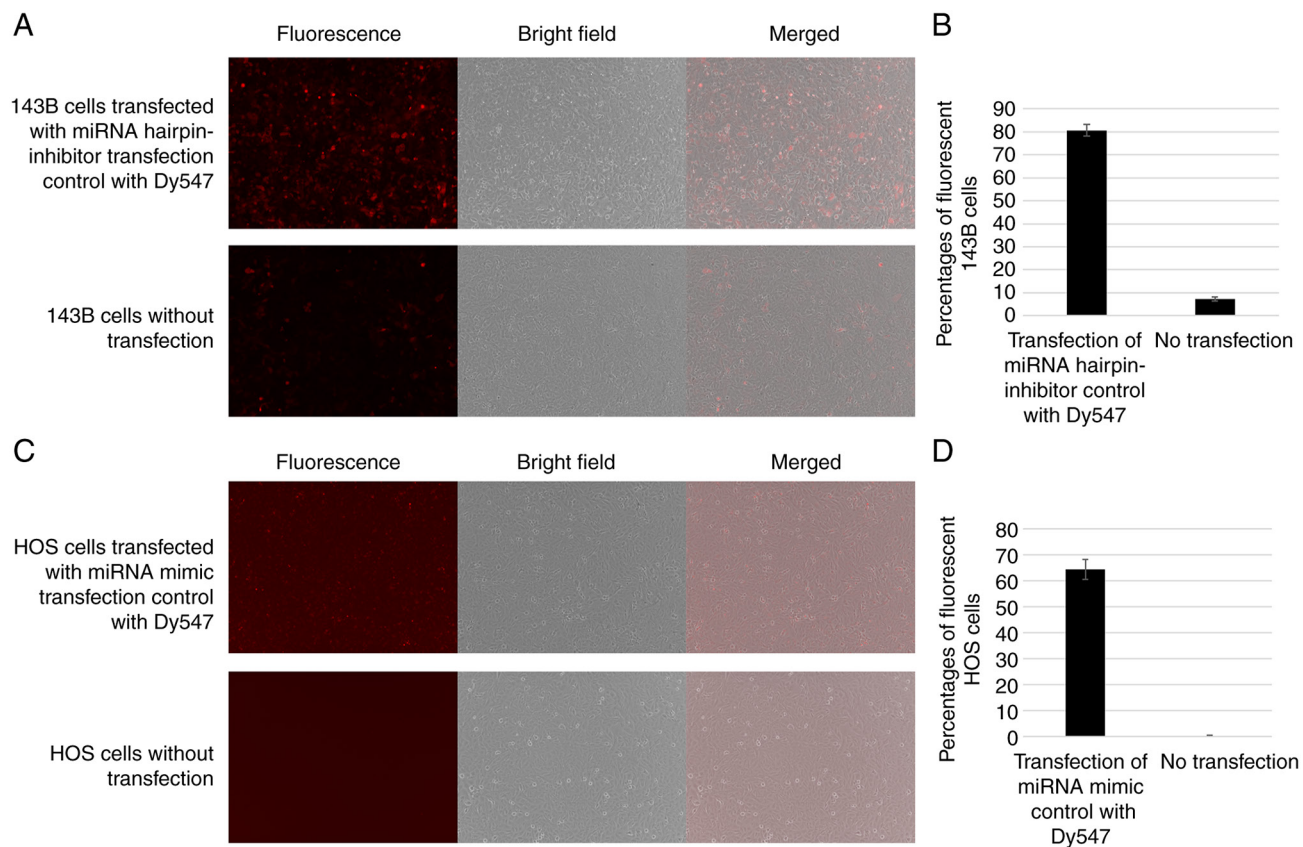

Supplement: Supplementary file 1 [file downloadSupplementary]
